# Supplementary material
Source: publisher figshare collection journal article supplement (https://geolsoc.figshare.com/ndownloader/files/27765906)
Supplement: Supplementary file 1 [file 27765906]

Reference,Ward et al (1998) site no.,Location/Test ID,,Distance,Velocities,,,,,,,,,,,
,,,Location on Figure 3,,Well to well,,Well to spring,Sink/doline to spring,Ditch or sink to well,All,All sink to spring,All well to well,All hybrid,All not sink to spring,All,
,,,,,Natural gradient,Forced gradient,,,,,,,,,Natural gradient,Forced gradient
,,,,m,m/d,m/d,m/d,m/d,m/d,m/d,m/d,m/d,m/d,m/d,m/d,m/d
1,39,Etton (acid),3,350,,560,,,,560,,560,,560,,560
5,,Etton 3e to 4,3,122,,488,,,,488,,488,,488,,488
5,,Etton 4e to 4,3,366,,800,,,,800,,800,,800,,800
5,,Etton 4e to 2,3,366,,"1,760",,,,"1,760",,"1,760",,"1,760",,"1,760"
6,5,M25/M1,6,"3,000","2,600",,,,,"2,600",,"2,600",,"2,600","2,600",
6,5,M25/M1,6,"3,100",,155,,,,155,,155,,155,,155
6,5,M25/M1,6,"3,000",120,,,,,120,,120,,120,120,
8,30,Kilham HPH1-HPH2,1,40,53,,,,,53,,53,,53,53,
8,,Kilham MD-LKF,1,"1,000",480,,,,,480,,480,,480,480,
8,6,Kilham BRD-TPB,1,"3,100",440,,,,,440,,440,,440,440,
8,,Kilham WEF-KSW,1,"2,400",150,,,,,150,,150,,150,150,
9,,Banterwick,7,284,,"2,820",,,,"2,820",,"2,820",,"2,820",,"2,820"
9,,Banterwick,7,70,,"1,902",,,,"1,902",,"1,902",,"1,902",,"1,902"
2,,Gussage All Saints,10,8,,64,,,,64,,64,,64,,64
10,8,Horseheath,5,40,,110,,,,110,,110,,110,,110
10,9,West Wratting,5,134,,38,,,,38,,38,,38,,38
10,18,Cambridge Hill,5,160,,904,,,,904,,904,,904,,904
10,26,Ashdon,5,163,,166,,,,166,,166,,166,,166
10,44,Snetterton,4,170,,37,,,,37,,37,,37,,37
10,45,West Harling,4,256,,170,,,,170,,170,,170,,170
10,46,Snetterton,4,199,,51,,,,51,,51,,51,,51
11,,Beswick,2,25,,18,,,,18,,18,,18,,18
11,,Beswick,2,25,,19,,,,19,,19,,19,,19
11,,Beswick,2,25,,12,,,,12,,12,,12,,12
16,,Whitchurch STP,13,120,12,,,,,12,,12,,12,12,
16,,Whitchurch STP,13,200,20,,,,,20,,20,,20,20,
17,,Lovedean,15,900,,500,,,,500,,500,,500,,500
20,,St Albans ,6,24,,25,,,,25,,25,,25,,25
21,,London,18,122,,"2,110",,,,"2,110",,"2,110",,"2,110",,"2,110"
8,,Kilham,1,"3,800",,,475,,,475,,,475,475,475,
3,22,Burpham,16,"1,200",,,"2,400",,,"2,400",,,"2,400","2,400",,"2,400"
4,1,Arish mell,12,400,,,100,,,100,,,100,100,100,
10,7,Water end,6,"16,600",,,,,"4,200","4,200",,,"4,200","4,200",,"4,200"
15,,South Mimms,6,"19,500",,,,,"3,100","3,100",,,"3,100","3,100",,"3,100"
15,,South Mimms,6,"2,920",,,,,"2,900","2,900",,,"2,900","2,900",,"2,900"
10,4,Addington,19,"3,200",,,,,"1,950","1,950",,,"1,950","1,950",,"1,950"
15,,Turnford PWS well,6,"13,000",,,,,"2,690","2,690",,,"2,690","2,690",,"2,690"
15,,Essendon PWS well,6,"6,800",,,,,"2,050","2,050",,,"2,050","2,050",,"2,050"
15,,Amwell Marsh PWS,6,"16,600",,,,,"2,040","2,040",,,"2,040","2,040",,"2,040"
15,,Hatfield PWS well,6,"3,200",,,,,"1,770","1,770",,,"1,770","1,770",,"1,770"
16,,Whitchurch STP,13,18,,,,,24,24,,,24,24,24,
10,7,Water End,6,"15,100",,,,"5,250",,"5,250","5,250",,,,"5,250",
10,7,Water End,6,"8,100",,,,"3,300",,"3,300","3,300",,,,"3,300",
10,7,South Mimms,6,"18,200",,,,"2,700",,"2,700","2,700",,,,"2,700",
22,2,Horndean,15,"5,750",,,,"2,200",,"2,200","2,200",,,,"2,200",
13,,Rowlands Castle,15,"4,700",,,,"4,180",,"4,180","4,180",,,,"4,180",
18,3,Stanford Dingley,8,"4,700",,,,"5,700",,"5,700","5,700",,,,"5,700",
19,,Smithcroft Copse,8,"5,100",,,,"4,900",,"4,900","4,900",,,,"4,900",
19,,Miriams Copse,8,"1,600",,,,"4,300",,"4,300","4,300",,,,"4,300",
19,,Cromwells,8,"1,250",,,,640,,640,640,,,,640,
15,,Arkley Hole spring,6,"8,100",,,,"2,670",,"2,670","2,670",,,,"2,670",
15,,Lynchmill Spring,6,"15,300",,,,"2,070",,"2,070","2,070",,,,"2,070",
17,,Lovedean,15,"6,450",,,,"1,600",,"1,600","1,600",,,,"1,600",
17,,Rowland's Castle,15,"4,700",,,,"3,900",,"3,900","3,900",,,,"3,900",
17,,Horndean,15,"5,750",,,,"3,000",,"3,000","3,000",,,,"3,000",
,,,,,,,,,,,,,,,,
REFERENCES,,,,,,,,,,,,,,,,
"1.       Foster, S.S.D, Milton, V.A., 1974. The permeability and storage of an unconfined Chalk aquifer. Hydrol. Sci. Bull. 19(4), 485-500.",,,,,,,,,,,,,,,,
"2.       Ivanovitch and Smith B.O., 1978 — Determination of aquifer parameters by a two well pulsed method using radioactive tracers. Journal of Hydrology, 36, pp. 35–45.",,,,,,,,,,,,,,,,
"3.       Atkinson, T.C., and Smart, P.L., 1981, Artificial tracers in hydrogeology, in A survey of British hydrogeology 1980: London, Royal Society, p. 173–190.",,,,,,,,,,,,,,,,
"4.       Alexander (1981) in MacDonald, A.M., Brewerton, L.J. and Allen, D.J., 1998. Evidence for rapid groundwater flow and karst-type behaviour in the Chalk of southern England. Geological Society, London, Special Publications, 130(1), pp.95-106.",,,,,,,,,,,,,,,,
"5.       Skilton, H. and Wheeler, D. 1988.  Bacteriophage tracer experiments in groundwater. Journal of Applied Bacteriology, 65, 5, 387-395.",,,,,,,,,,,,,,,,
"6.       Price, M., Atkinson, T.C., Wheeler, D., Barker, J.A. and Monkhouse, R.A. 1989. Highway drainage to the Chalk Aquifer: the movement of groundwater in the Chalk near Bricket Wood, Hertfordhire, and its possible pollution by drainage from the M25. British Geological Survey Technical Report WD/89/3.",,,,,,,,,,,,,,,,
"7.       Skilton, H. and Wheeler, D. (1989) The application of bacteriophage as tracers in chalk aquifer systems. J. Appl. Bacteriol., 66, 5, 549-557.",,,,,,,,,,,,,,,,
"8.       Ward, R.S., Williams, A.T. and Chadha, D.S. 1997. The use of groundwater tracers for assessment of protection zones around water supply boreholes – a case study. In: Ed. Kranjc, A. 1997. Tracer hydrology 97. AA Balkema, Rotterdam, pp 369-376.",,,,,,,,,,,,,,,,
"9.       Schürch, M. and Buckley, D., 2002. Integrating geophysical and hydrochemical borehole-log measurements to characterize the Chalk aquifer, Berkshire, United Kingdom. Hydrogeology Journal, 10(6), pp.610-627.",,,,,,,,,,,,,,,,
"10.   Ward, R.S., Williams, A.T., Barker, J.A., Brewerton, L.J. and Gale, I.N., 1998. Groundwater Tracer Tests: a review and guidelines for their use in British Aquifers. British Geological Survey Report WD/98119. ",,,,,,,,,,,,,,,,
"11.   Hartmann, S., Odling, N.E., West, L.J. 2007. A multi-directional tracer test in the fractured Chalk aquifer of E. Yorkshire, UK.  Journal of Contaminant Hydrology, 94, 3–4, 315-331.",,,,,,,,,,,,,,,,
"12.   Maurice, L.., Atkinson, T.C., Barker, J.A., Bloomfield, J.P., Farrant, A.R. and Williams, A.T., 2006. Karstic behaviour of groundwater in the English Chalk. Journal of Hydrology, 330, 63-70.",,,,,,,,,,,,,,,,
"13.   Day,J.B.W., 1964. Infiltration into a groundwater catchment and the derivation of evaporation. Water Supply Papers of the Geological Survey of G.B. Research Report No. 2. ",,,,,,,,,,,,,,,,
"14.   Maurice, L. 2008. Investigations of rapid groundwater flow and karst in the Chalk. Unpublished PhD thesis, University College London.",,,,,,,,,,,,,,,,
"15.   Cook, S. J. (2010), The hydrogeology of bromate contamination in the Hertfordshire Chalk: Incorporating Karst in Predictive Models., EngD, University College London.",,,,,,,,,,,,,,,,
"16.   Baxter, K.M. 1985. The effects on groundwater quality of the introduction of secondary sewage treatment to an effluent recharge site on the Chalk of southern England. Journal of Hydrology, Volume 77, Issue 1, p. 333-359.",,,,,,,,,,,,,,,,
"17.   Barton, M.E., Cater, R., Price, N.J., 1996. The Chalk swallow-holes of south-east Hampshire: geological setting, groundwater hazards and ﬁssure ﬂow rates. In: Lerner, D.N., Walton, N. (Eds.), Contaminated land and groundwater – future directions: Preprint volume, 32nd Annual Conference of the Engineering Group. Geological Society, London, pp. 355–362.",,,,,,,,,,,,,,,,
"18.   Banks, D., Davies, C. & Davies, W. 1995. The Chalk as a karstic aquifer: evidence from a tracer test at Stanford Dingley, Berkshire, UK, Quarterly Journal of Engineering Geology, 28, S31-S38.",,,,,,,,,,,,,,,,
"19.   Maurice, L.D., Atkinson, T.C., Williams, A.T., Barker, and Farrant, A.R. 2010.  Catchment Scale tracer testing from karstic features in a porous limestone. Journal of Hydrology. 389 (1-2) 31-4.",,,,,,,,,,,,,,,,
"20.   Bottrell, S.H., Thornton, S.F., Spence, M.J., Allshorn, S and Spence, K.H. 2010. Assessment of the use of fluorescent tracers in a contaminated Chalk aquifer. Quarterly Journal of Engineering Geology and Hydrogeology, 43, 195-206",,,,,,,,,,,,,,,,
"21.   Law, R. and Mackay, R. 2010. Determining fracture properties by tracer and thermal testing to assess thermal breakthrough risks for ground source heating and cooling in the Chalk Quarterly Journal of Engineering Geology and Hydrogeology, 43, 269-278.",,,,,,,,,,,,,,,,
"22.   Atkinson, T. C. and Smith, D. I. 1974 Rapid groundwater flow in fissures in the Chalk: an example from South Hampshire, Quarterly Journal of Engineering Geology, 7, 197-205.",,,,,,,,,,,,,,,,
